# Supplementary material for: Learning transcriptional regulatory networks from high throughput gene expression data using continuous three-way mutual information
Source: Springer Nature journal article supplement (doi:10.1186/1471-2105-9-467), 2008-11-03
Supplement: 12859_2008_2452_MOESM2_ESM.pdf [file 12859_2008_2452_MOESM2_ESM.pdf]

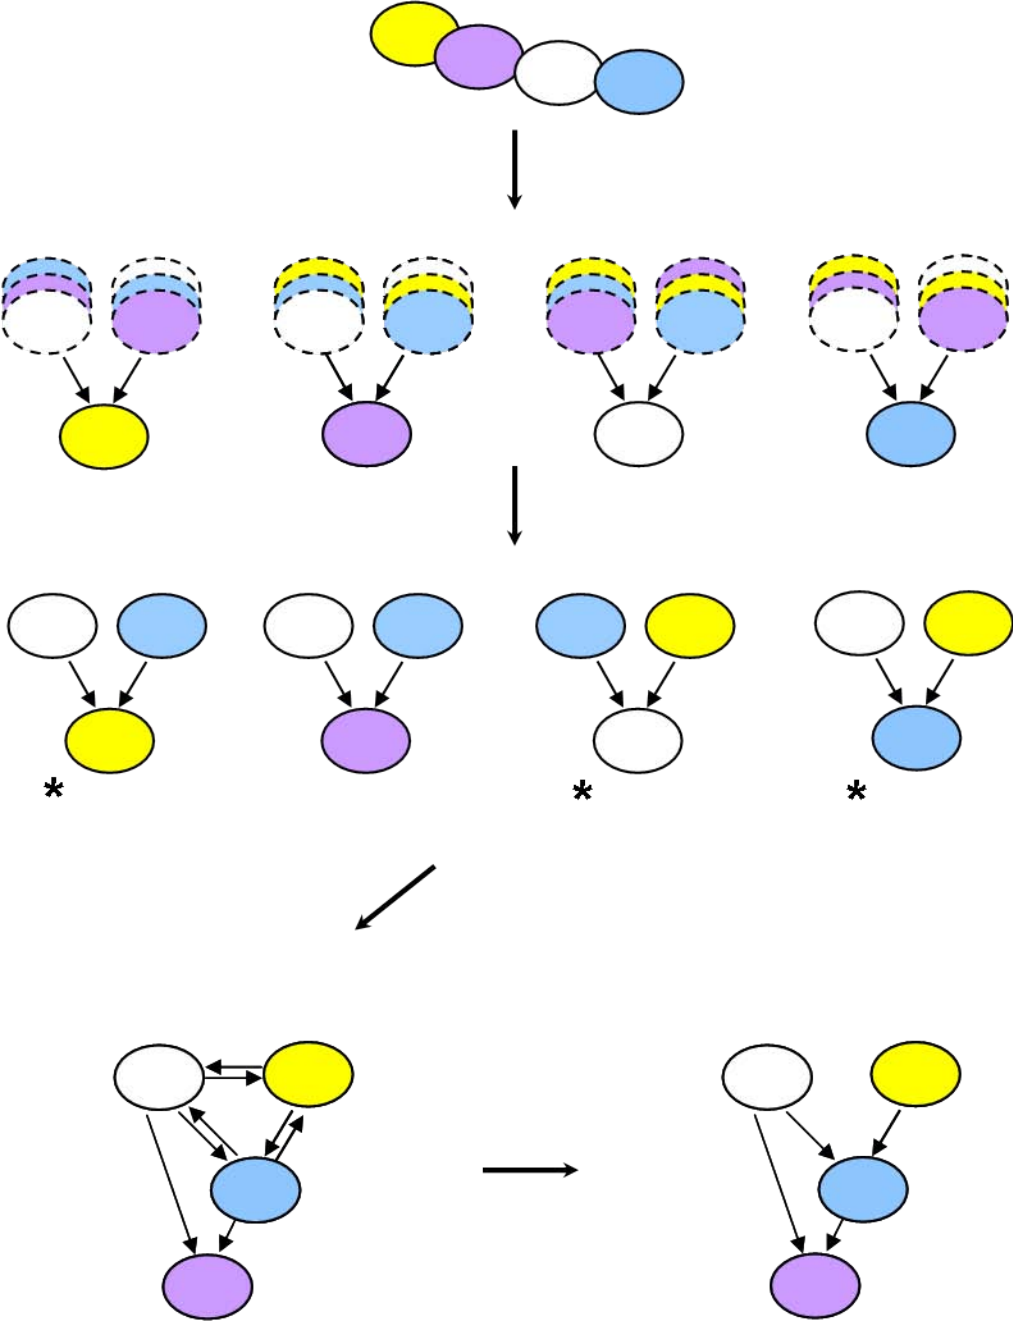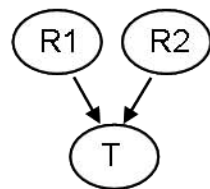

Step 1: local  
net learning

Step 2: global  
net assembly
