# Supplementary material for: Learning transcriptional regulatory networks from high throughput gene expression data using continuous three-way mutual information
Source: Springer Nature journal article supplement (doi:10.1186/1471-2105-9-467), 2008-11-03
Supplement: 12859_2008_2452_MOESM3_ESM.pdf [file 12859_2008_2452_MOESM3_ESM.pdf]

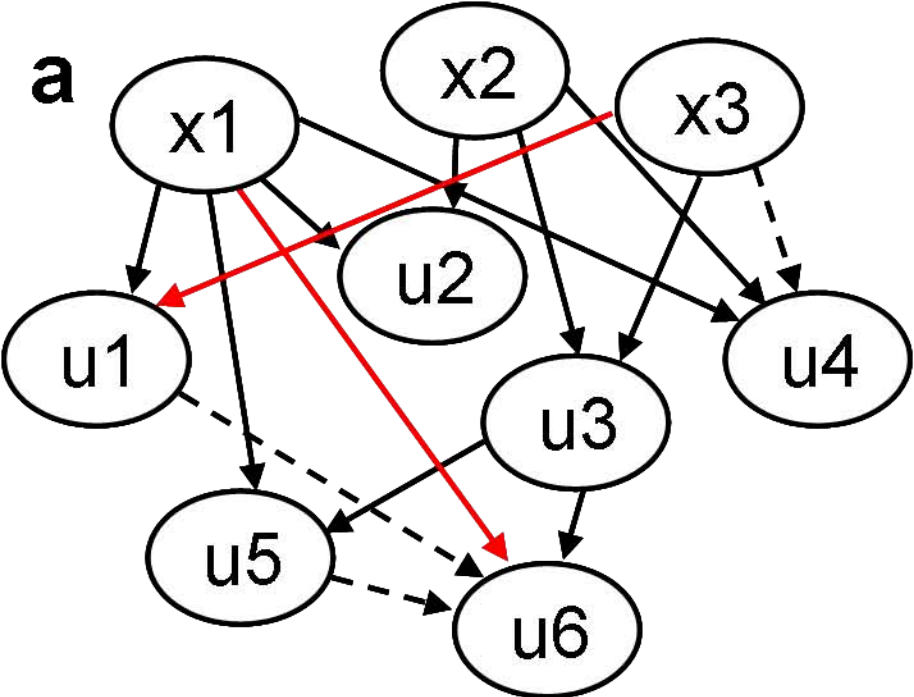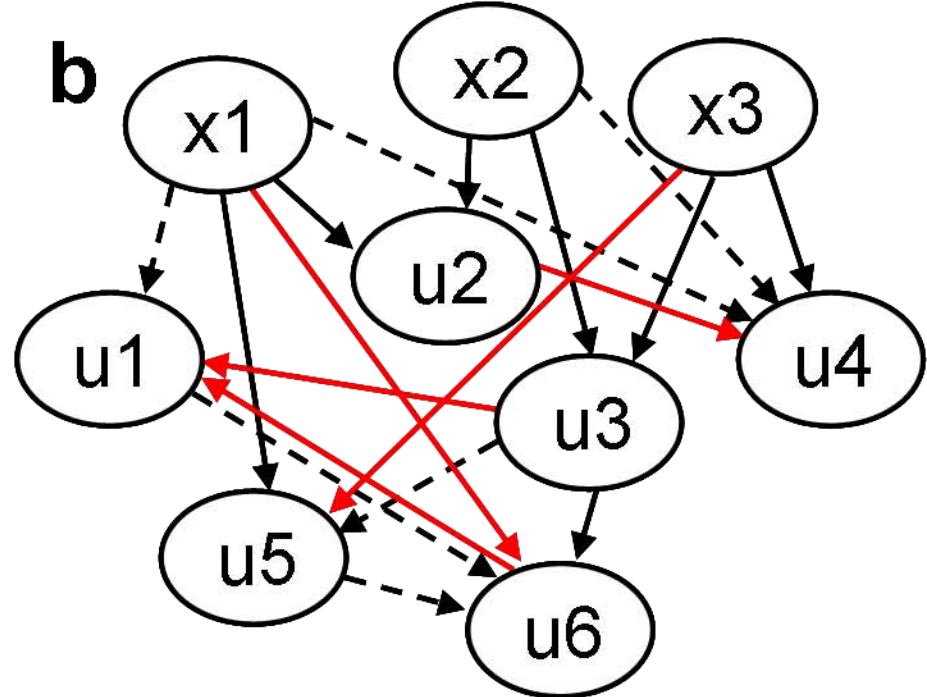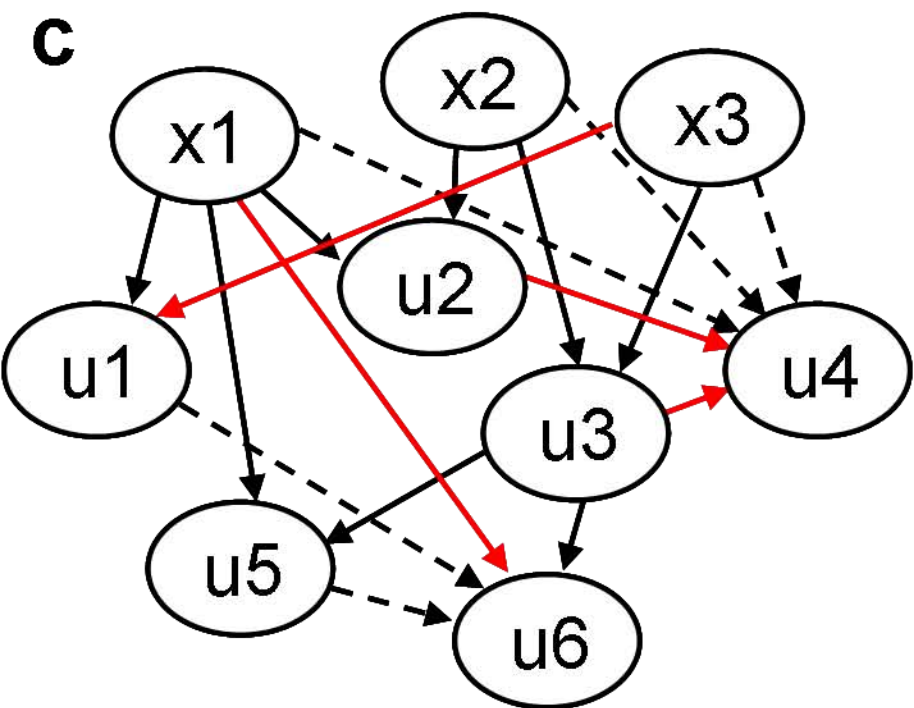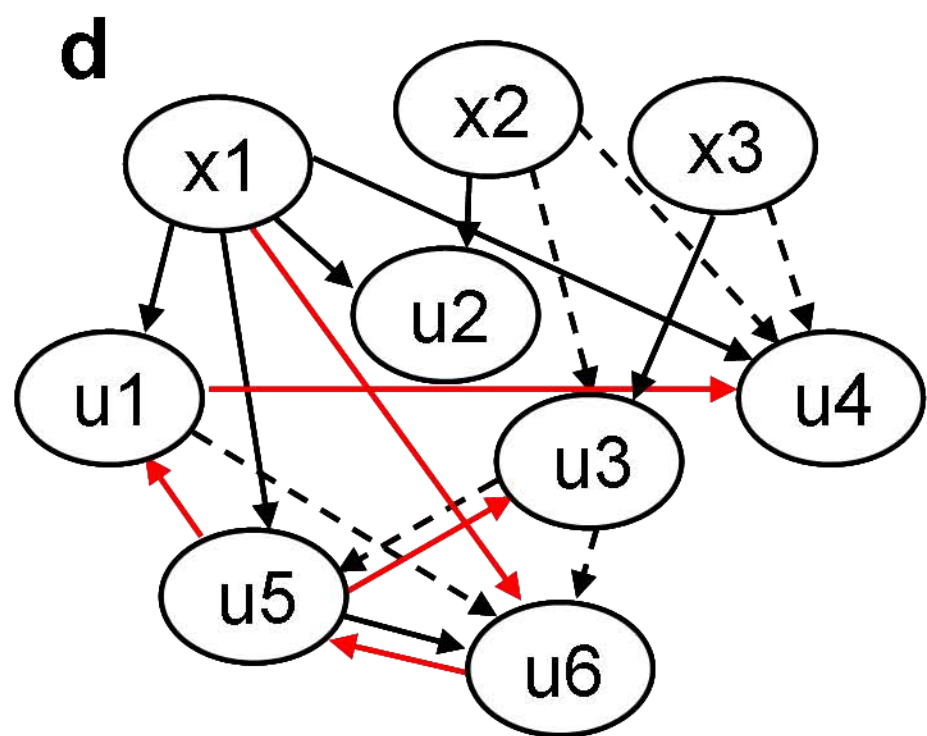

→ True positive

→ False positive

- - - False negative
